a) Component algorithms based on records of diagnoses

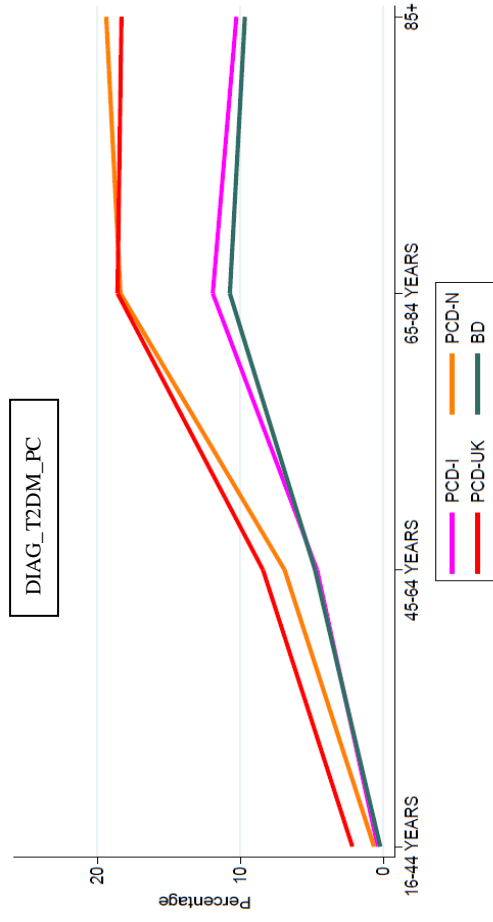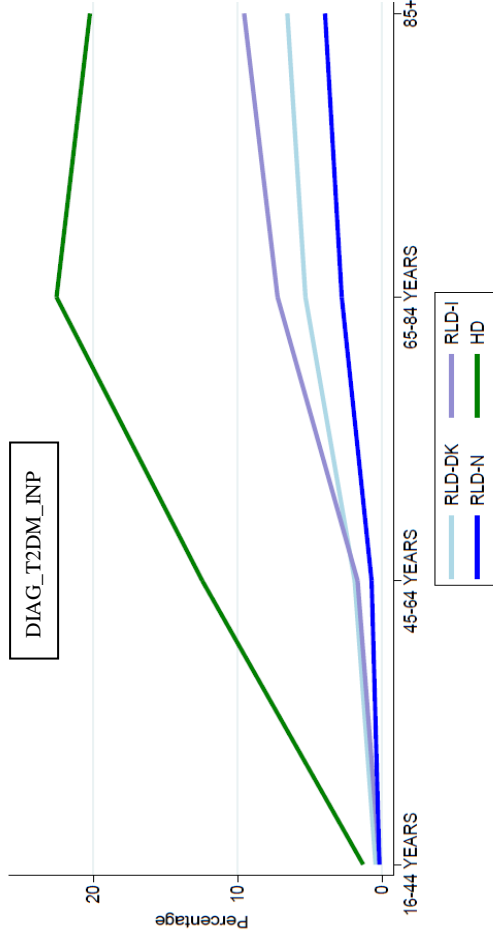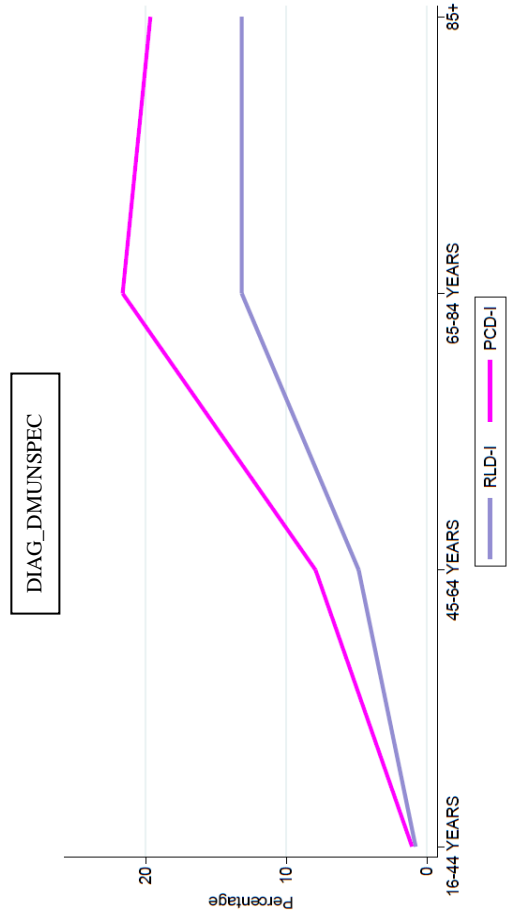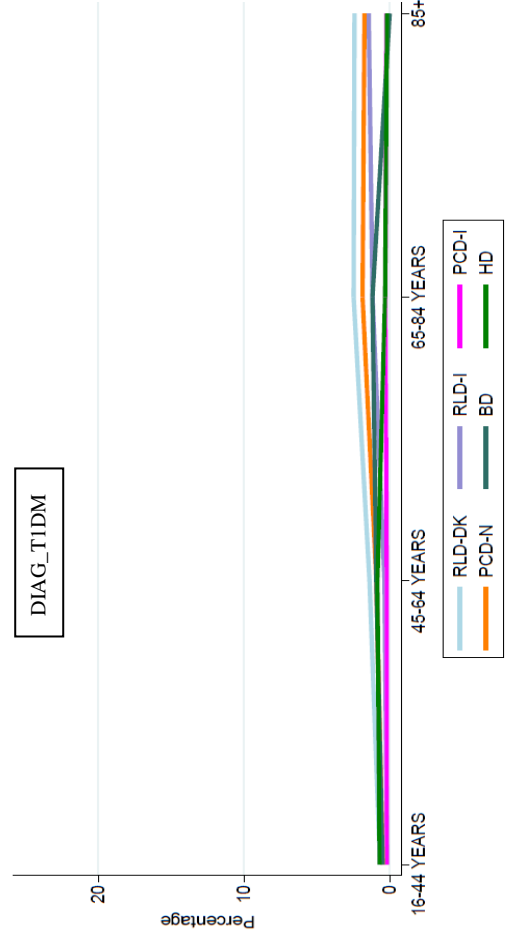

b) Component algorithms based on records of drug utilization

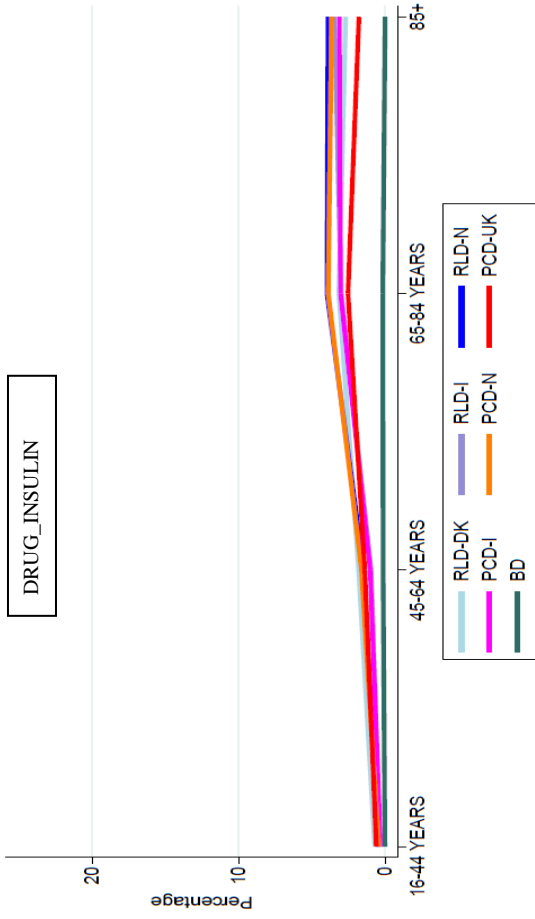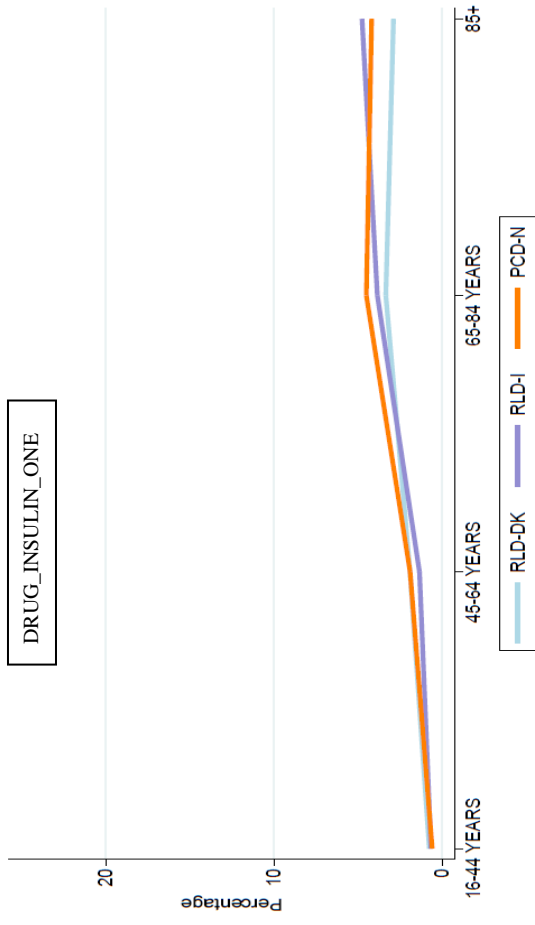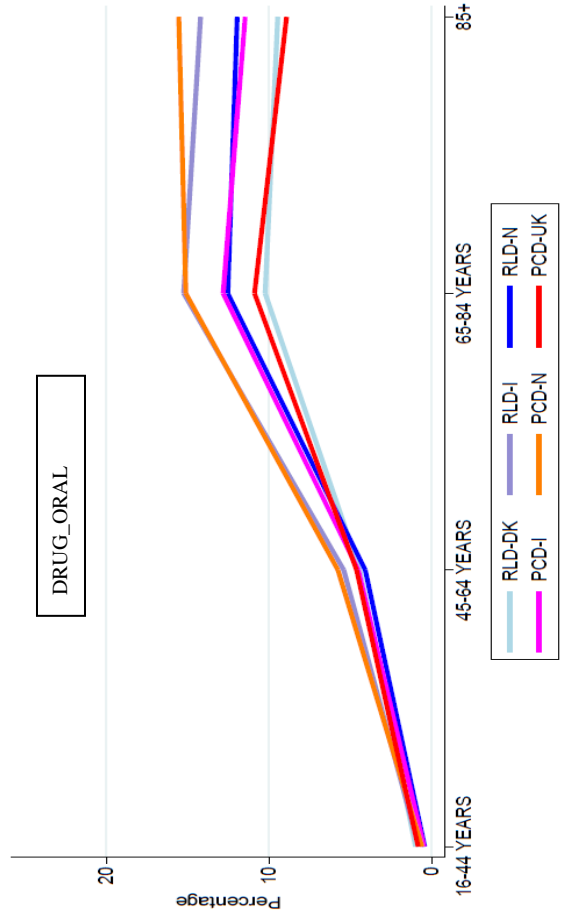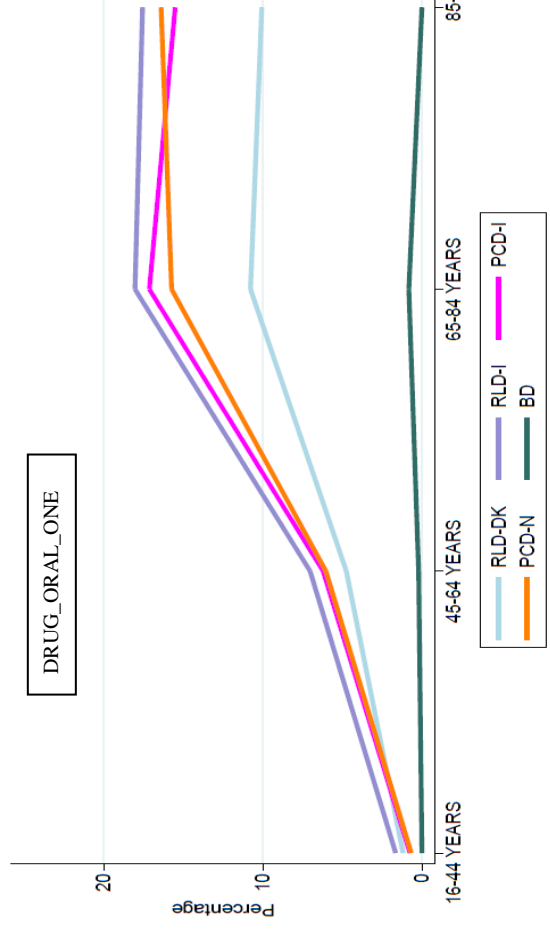

c) Component algorithms based on records of utilization of diagnostic tests

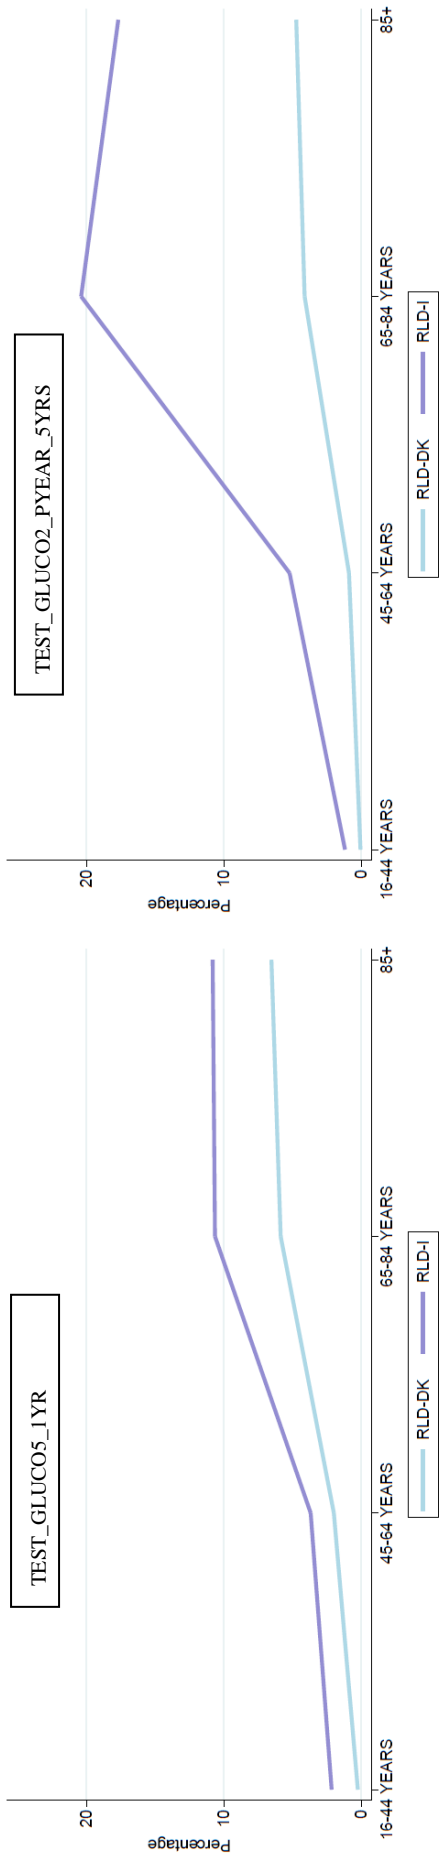

d) Component algorithms based on records of laboratory results

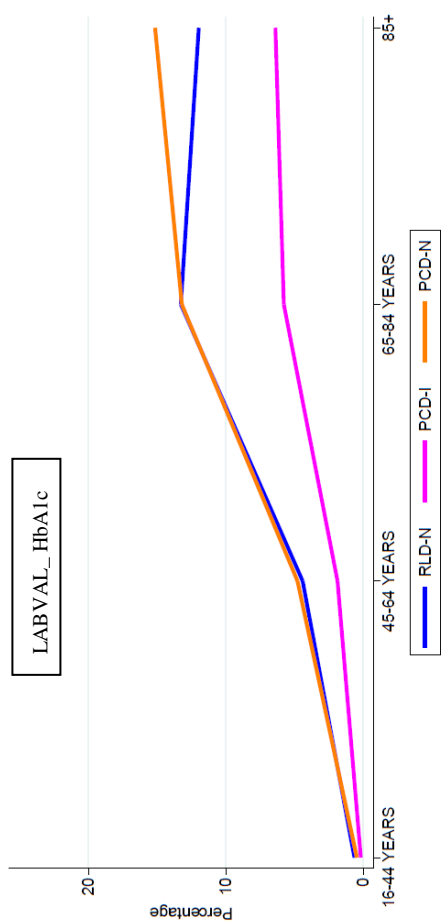

Source: https://storage.googleapis.com/plos-corpus-prod/10.1371/journal.pone.0160648/1/pone.0160648.s001.pdf
